# Supplementary material for: The KRAS-Mutant Consensus Molecular Subtype 3 Reveals an Immunosuppressive Tumor Microenvironment in Colorectal Cancer
Source: MDPI journal article supplement (doi:10.3390/cancers15041098), 2023-02-08

Tumor microenvironment (TME) *KRAS*<sup>mut</sup>

## Tumor Microenvironment Pathway : GeoMx Cancer and TME : Expr Fold Change

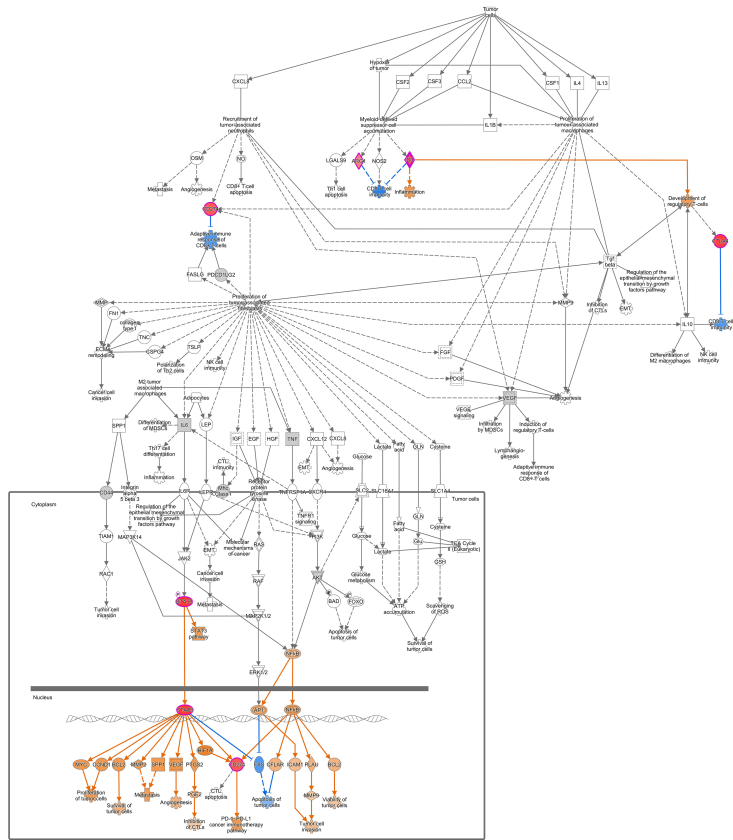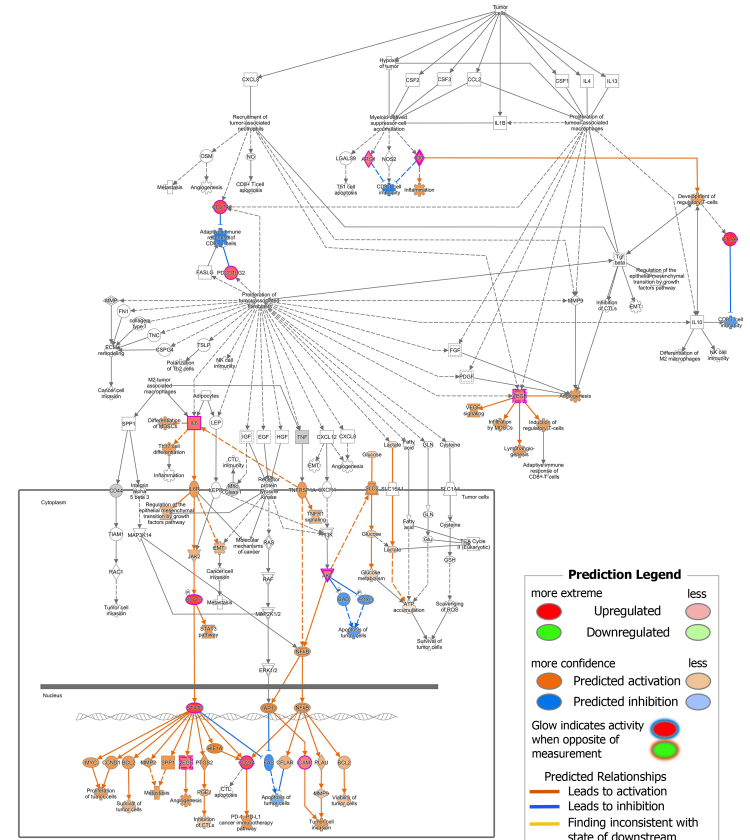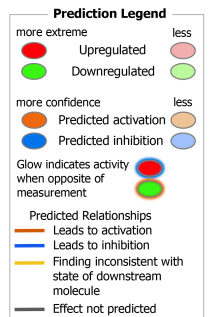

Supplement: s1 [file s1]
