# Supplementary material for: The KRAS-Mutant Consensus Molecular Subtype 3 Reveals an Immunosuppressive Tumor Microenvironment in Colorectal Cancer
Source: MDPI journal article supplement (doi:10.3390/cancers15041098), 2023-02-08
Supplement: s1 [file s1]

**Supplemental Figure S1.** The IPA pathway analysis of 92 DEGs for *KRAS*<sup>mut</sup> from the NanoString PanCancer progression panel reveals that the illustration map of TGFβ signaling pathway was activated

TGF-β Signaling

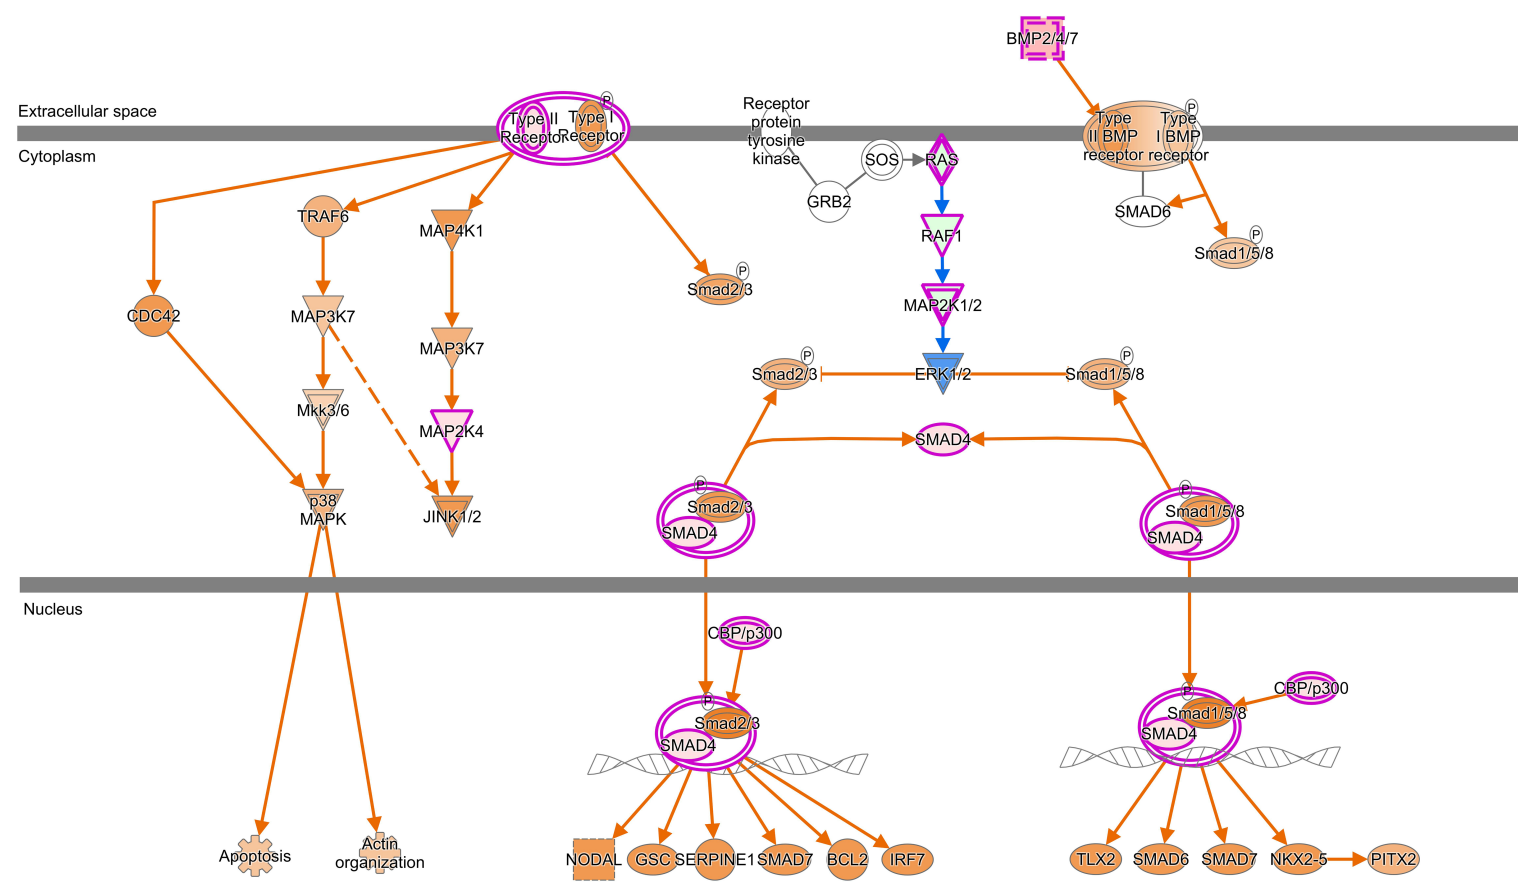

© 2000-2022 QIAGEN. All rights reserved.

**Prediction Legend**

|                                                        |      |
|--------------------------------------------------------|------|
| more extreme                                           | less |
| Upregulated                                            |      |
| Downregulated                                          |      |
| more confidence                                        | less |
| Predicted activation                                   |      |
| Predicted inhibition                                   |      |
| Glow indicates activity when opposite of measurement   |      |
|                                                        |      |
| <b>Predicted Relationships</b>                         |      |
| Leads to activation                                    |      |
| Leads to inhibition                                    |      |
| Finding inconsistent with state of downstream molecule |      |
| Effect not predicted                                   |      |
